# Supplementary material for: Phosphabarrelene–rhodium complexes as highly active catalysts for isomerization free hydroformylation of internal alkenes
Source: Royal Society of Chemistry journal article supplement (doi:10.1039/b315709a), 2004-01-01
Supplement: b315709a.doc [file b315709a.doc]

# Electronic Supplementary Information

Phosphabarrelene-rhodium complexes as highly active catalysts for isomerization free hydroformylation of internal alkenes

**Bernhard Breit*, Evelyn Fuchs**

*Institut für Organische Chemie und Biochemie, Albert-Ludwigs-Universität Freiburg, Albertstr. 21, 79104 Freiburg, Germany. Fax: 0049-761-2038715; E-mail: bernhard.breit@organik.chemie.uni-freiburg.de*

**General Information**. Reactions were performed in flame-dried glassware under argon (purity >99.99998 %). The solvents were dried by standard procedures, distilled, and stored under argon. Temperatures quoted are not corrected. NMR spectra were recorded on Bruker DRX 500 (500 MHz), Bruker AM 400 (400 MHz) and Varian Mercury 300 HFCP (300 MHz) spectrometers and are reported in ppm with tetramethylsilane (TMS), CHCl3 or C6­H6 as internal standards. 31P NMR spectra were calibrated with H3PO4 as external standard. Data are reported as follows: (s = singlet, d = doublet, t = triplet, q = quartet, q = quintet, m = multiplet, m*c* = centrosymmetric multiplet; coupling constant(s) in Hz; integration; assignment). Hydroformylation reactions were carried out in a Premex reactor stainless steel pressure vessel equipped with a pressure gauge, inlet pipe, gas inlet, sample riser and pressure release valve. Synthesis gas [1:1 mixture of H2 and CO (purity: H2:4.3, CO: 3.1)] was purchased from Messer-Griesheim.

**Synthesis of 4c:** *o*-Fluorobromobenzene (9.93 g, 56.73 mmol) was added dropwise at RT to magnesium (1.37 g, 56.73 mmol) and **3c** (10.00 g, 26.27 mmol) in anhydrous THF (70 ml). After the exothermic reaction had ceased the red mixture was heated to reflux for three hours. After cooling to RT, water (7 ml) was added. The solvent was evaporated in vacuo, the residue extracted with toluene (100 ml) and the organic phase was washed with water (3120 ml). The aqueous phase was reextracted with toluene (250 ml). The combined organic phases were dried (Na2SO4) and the solvent was removed in vacuo. The residue was slurried with petroleum ether (120 ml, 5% triethylamine). The resulting suspension was filtered with petroleum ether (300 ml, 5% triethylamine) through a pad of silica gel (57 cm). The solvent was evaporated in vacuo and the residue was heated to reflux in methanol (80 ml) for two hours. Filtration and drying in vacuo gave **4c** (5.64 g, 47%) as a colorless solid. Selected physical data of **4c**: Mp.: 168-169°C; 1H-NMR (300 MHz, CDCl3):  = 2.18 (s, 6H, CH3), 2.29 (s, 6H, CH3), 6.52-6.56 (m, 1H, H-5), 6.93-6.98 (m, 6H, H-3´´, H-9 u. H-12), 7.00-7.05 (m, 2H, H-4 u. H-6), 7.42-7.49 (m, 1H, H-4´), 7.52-7.59 (m, 2H, H-3´), 7.69-7.73 (m, 4H, H-2´ u. H-2´´), 7.76-7.78 (m, 1H, H-3); 13C-NMR (75 MHz, CDCl3):  = 21.0 (d, 4*J*C,P = 1.7 Hz, 2C, C-2´´-CH3), 21.1 (s, 2C, C-4´´-CH3), 63.5 (d, 3*J*C,P = 2.9 Hz, 1C, C-8), 123.9 (d, 3*J*C,P = 14.1 Hz, 1C, C-4), 124.0 (s, 1C, C-5), 126.4 (s), 126.8 (d, *J* = 1.7 Hz), 127.2 (s, 1C, C-6), 128.1 (d, *J* = 6.3 Hz), 128.9 (d, *J* = 4.3 Hz), 131.0 (s), 131.3 (d, 2*J*C,P = 37.1 Hz, 1C, C-3), 135.2 (d, *J* = 2.0 Hz), 136.9 (d, *J* = 1.4 Hz), 137.4 (d, *J* = 22.2 Hz), 141.3 (s, 2C, C-9 u. C-12), 142.1 (d, 1*J*C,P = 15.3 Hz, 1C, C-2), 149.6 (d, *J* = 3.8 Hz), 154.7 (d, 1*J*C,P = 21.3 Hz, 2C, C-10 u. C-11), 155.3 (d, 2*J*C,P = 3.2 Hz, 1C, C-7); 31P-NMR (500 MHz, CDCl3):  = - 57.1 (s).

**General procedure for hydroformylation experiments:** In an argon atmosphere the phosphorous ligand and [Rh(CO)2acac] were dissolved in toluene and stirred for 15 min at RT. The resulting solution was transferred into the autoclave (stainless steel, 100 ml). A pressure of 5 bar CO/H2 was applied, and the autoclave was heated within 30 minutes to the reaction temperature while the solution was stirred (1000 min-1). The olefin was added to the reaction mixture through a pressure vessel, then the syngas pressure was adjusted to 10 bar. At the indicated reaction times samples were taken through a sample valve and analyzed by GC and/or NMR.
